# Supplementary material for: Stable X Chromosome Reactivation in Female Human Induced Pluripotent Stem Cells
Source: PubMed Central journal article supplement — Stem Cell Reports. 2015 Jan 29;4(2):199–208. doi: 10.1016/j.stemcr.2014.12.012 (PMC4325229; doi:10.1016/j.stemcr.2014.12.012), 2015-01-29
Supplement: mmc1.pdf [file mmc1.pdf]

**Stem Cell Reports**

**Supplemental Information**

**Stable X Chromosome Reactivation  
in Female Human Induced Pluripotent Stem Cells**

**Tahsin Stefan Barakat, Mehrnaz Ghazvini, Bas de Hoon, Tracy Li, Bert Eussen, Hannie Douben, Reinier van der Linden, Nathalie van der Stap, Marjan Boter, Joop S. Laven, Robert-Jan Galjaard, J. Anton Grootegoed, Annelies de Klein, and Joost Gribnau**

## Supplemental Experimental Procedures

### *hiPS cell generation and culture*

To generate iPSC,  $1 \times 10^5$  human fibroblasts from lines X12 (p12), X15 (p4), and 47,XXX (p14) were seeded per well of a 6-well plate. The next day, cells were transduced with a polycistronic lentiviral reprogramming vector (Warlich et al., 2011) for 16 hours in the presence of 4  $\mu\text{g/ml}$  polybrene (Millipore). Cells were further cultured in fibroblast medium at 20%  $\text{O}_2$ . At day 4 post-transduction,  $5 \times 10^4$  cells were seeded on irradiated MEFs in fibroblast medium. One day later, medium was changed to standard human ESC medium. From day 2 to 9 medium was supplemented with 2 mmol/l valproic acid (Calbiochem) as described by Warlich et al. (2011). iPSC colonies were picked between day 22 to 25 and further propagated on MEFs. Human iPSC lines growing on conventional/standard medium were passaged weekly using collagenase IV (1 mg/ml, Invitrogen) on  $\gamma$ -irradiated MEFs. All analysis for characterization of hiPSC was performed prior to cryopreservation.

All hESC and hiPSC cells were maintained in human ESC culture medium, consisting of DMEM/F12 (Gibco-Invitrogen) supplemented with 20% knock-out serum replacement (Gibco-Invitrogen), 2mM L glutamine, 1: 50 units of penicillin/streptomycin/glutamine, 0.1 mM MEM-non-essential amino acids (PAA Laboratories GmbH), 0.1mM  $\beta$ -mercaptoethanol (Sigma), and 10 ng/ml bFGF (Invitrogen) filtered through a 0.22 $\mu\text{m}$  filter (Corning). For differentiation experiments, hiPSC cells were differentiated in suspension culture for 1 week in EB medium, consisting of IMDM-glutamax, 15% foetal calf serum, 100 U/ml penicillin, 100 mg/ml streptomycin, 1% non-essential amino acids (all Invitrogen), 37.8 mg/ml monothioglycerol (Sigma) and 50 mg/ml ascorbic acid (Sigma).

NHSM medium and culture conditions were as described by Gafni et al., 2013. Wis-NHSM medium containing knockout DMEM (Invitrogen), 20% knockout serum (Invitrogen), human insulin (Sigma, 12.5 $\mu\text{g ml}^{-1}$  final concentration), 10  $\mu\text{g ml}^{-1}$  recombinant human LIF (Peprotech), 8 ng  $\text{ml}^{-1}$  recombinant bFGF (Peprotech) and 1 ng  $\text{ml}^{-1}$  recombinant TGF- $\beta$ 1 (Peprotech), 1 mM glutamine (Invitrogen), 1% nonessential amino acids (Invitrogen), 0.1 mM beta-mercaptoethanol (Sigma), penicillin-streptomycin (Invitrogen) and small molecule inhibitors: PD0325901 (1 $\mu\text{M}$ , ERK1/2i, Axon Medchem); CHIR99021 (3 $\mu\text{M}$ , GSK $\beta$ i, Axon Medchem); SP600125 (10 $\mu\text{M}$ , JNKi, TOCRIS) and SB203580 (10  $\mu\text{M}$ , p38i, Axon Medchem) Y-27632 (5 $\mu\text{M}$ , ROCKi, Axon Medchem) and protein kinase C inhibitor G06983 (5  $\mu\text{M}$ , PKCi, TOCRIS). Naïve hiPSC clones were grown on  $\gamma$  irradiated MEFs on gelatin coated plates and passaged by single-cell trypsinization (0.05% + EDTA) every 4 days.

### *RT-PCR and single cell RT-PCR*

For single cell RT-PCR, cDNA was prepared with gene specific outer primers (a combination for four different genes per cell line), using the one-step RT-PCR kit (Invitrogen), according to manufacturer's instructions in a total volume of 16  $\mu\text{l}$ . After an initial amplification using the outer primers, nested PCR was performed using the internal primers, and Phusion PCR polymerase (Fynnzyme). PCR products

were precipitated, and digested with the indicated restriction enzymes (New England Biolabs) to distinguish expression from the different alleles. RFLPs in *XIST*, *SUVAR39H1*, *G6PD*, and SNPs in *HUWE1*, *NROB1* and *ATP7A* were identified by PCR amplification and Sanger sequencing, followed by allele specific expression analysis using cDNA specific primer sets described in **Supplementary Table 2**.

### ***HUMARA analysis***

To determine skewing of XCI, allele specific methylation of the Androgen receptor gene promoter was quantified using the HUMARA assay (Human Androgen Receptor Assay) (Allen et al., 1994); 40ng of genomic DNA was double digested with Ddel and HpaII (New England Biolabs) at 37°C in an overnight reaction. 1µl of reaction product was used as a template for PCR using Phusion polymerase (Fynnzyme) using FAM-labelled primers GCTGTGAAGGTTGCTGTTCCCTCAT and TCCAGAATCTGTTCCAGAGCGTGC. PCR products were visualized on a sequencer.

## Supplemental Experimental Figures

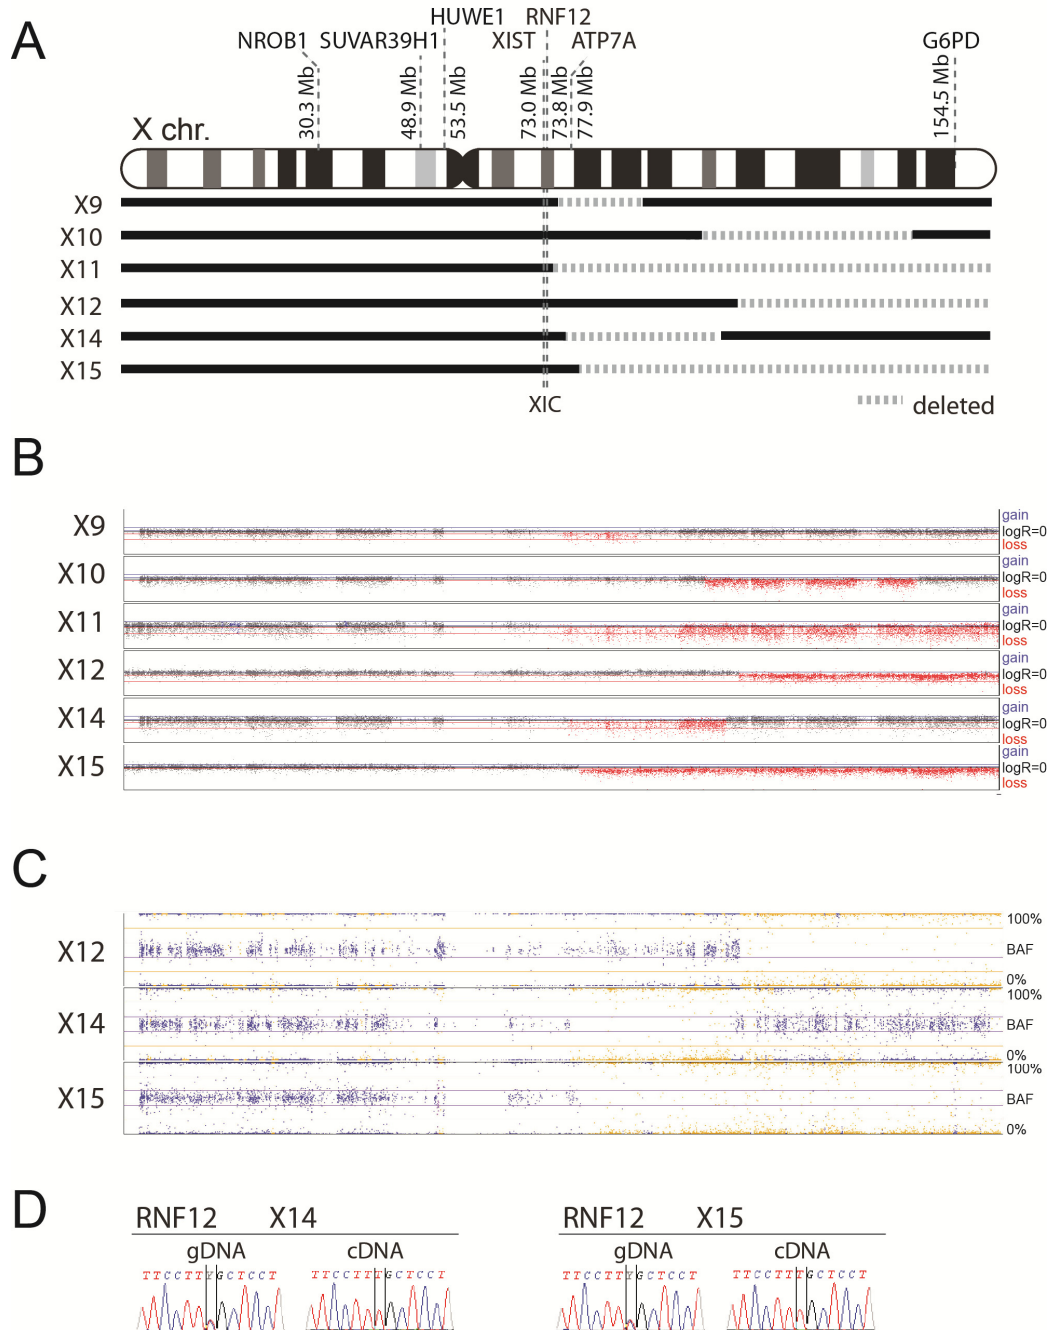

### Supplemental Figure S1: SNP Array of fibroblasts used to generate hiPSCs

**A)** Schematic representation of the human X chromosome. Deleted areas are indicated with dashed lines. **B)** SNP Array analysis showing the deleted areas in fibroblast cell line X9, X10, X11, X12, X14, and X15. Every dot is representing a probe along the X chromosome. Deleted areas are indicated in red. **C)** SNP Array data showing loss of heterozygosity (areas marked in yellow, with B allele frequency (BAF) of 100% or 0%) in the deleted regions in fibroblast cell line X12, X14, and X15. **D)** Allele specific expression analysis of a SNP in *RNF12* indicates completely skewed XCI in X14 and X15 fibroblasts.

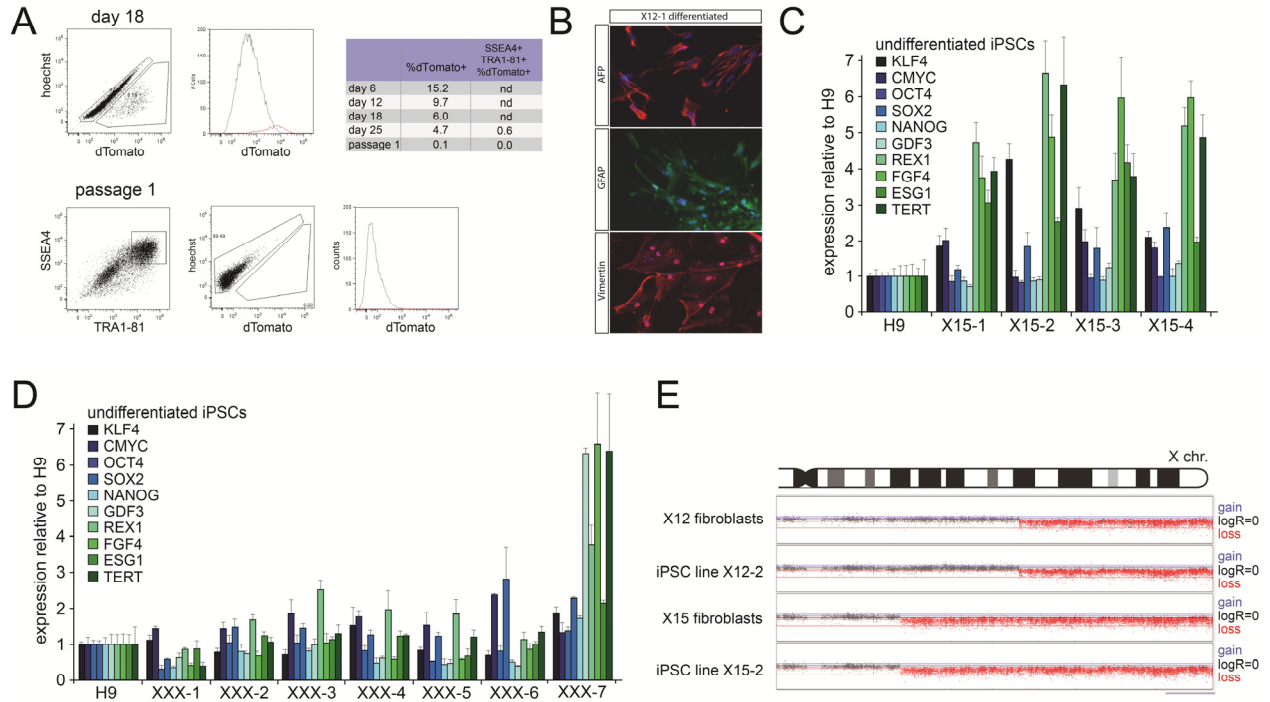

### Supplemental Figure S2: Gene expression analysis of hiPS cell lines

**A)** Transduced cells show a gradual loss of dTomato expression (right table). A small fraction of the cells is dTomato positive 18 days after transduction (left panels), but this expression is lost after picking of iPSC clones (bottom panels and table). No dTomato/SSEA4/TRA1-81 triple positive cells were detected at p1 (bottom panels and table). **B)** Immunocytochemistry on day 8 differentiated EBs plated on chamber slides prior to fixation. Pictures show cells positive for *AFP* (Rhodamine red), *GFAP* (FITC) and *vimentin* (Rhodamine red, DAPI is in blue). **C,D)** qRT-PCR analysis of pluripotency factors in X15 hiPSC lines (1-4, **C**), and 47,XXX hiPSC lines (1-7, **D**) The expression of the same factors in the hESC line (H9) that served as a control was set at 100%. **E)** SNP Array analysis showing the deleted areas in fibroblast cell lines X12 and X15 and in hiPSC lines X12-2 and X15-2. Every dot is representing a probe along the X chromosome. Deleted areas are indicated in red.

|           |       | XIST  |      |      |       | total |
|-----------|-------|-------|------|------|-------|-------|
|           |       | A     | B    | AB   | no    |       |
| SUVAR39H1 | A     | 13.5% | 2.1% | 1.0% | 9.4%  | 26.0% |
|           | B     | 15.6% | 0.0% | 0.0% | 4.2%  | 19.8% |
|           | AB    | 6.3%  | 0.0% | 0.0% | 6.3%  | 12.5% |
|           | no    | 30.2% | 2.1% | 1.0% | 8.3%  | 41.7% |
|           | total | 65.6% | 4.2% | 2.1% | 28.1% |       |

|           |       | XIST  |       |      |       | total |
|-----------|-------|-------|-------|------|-------|-------|
|           |       | A     | B     | AB   | no    |       |
| SUVAR39H1 | A     | 3.1%  | 5.2%  | 1.0% | 7.3%  | 16.7% |
|           | B     | 4.2%  | 2.1%  | 1.0% | 17.7% | 25.0% |
|           | AB    | 0.0%  | 2.1%  | 1.0% | 3.1%  | 6.3%  |
|           | no    | 3.1%  | 2.1%  | 1.0% | 45.8% | 52.1% |
|           | total | 10.4% | 11.5% | 4.2% | 74.0% |       |

|           |       | XIST  |      |      |       | total |
|-----------|-------|-------|------|------|-------|-------|
|           |       | A     | B    | AB   | no    |       |
| SUVAR39H1 | A     | 4.2%  | 1.0% | 1.0% | 1.0%  | 7.3%  |
|           | B     | 43.8% | 6.3% | 2.1% | 25.0% | 77.1% |
|           | AB    | 9.4%  | 2.1% | 0.0% | 2.1%  | 13.5% |
|           | no    | 2.1%  | 0.0% | 0.0% | 0.0%  | 2.1%  |
|           | total | 59.4% | 9.4% | 3.1% | 28.1% |       |

|           |       | XIST  |       |       |       | total |
|-----------|-------|-------|-------|-------|-------|-------|
|           |       | A     | B     | AB    | no    |       |
| SUVAR39H1 | A     | 4.2%  | 11.5% | 8.3%  | 2.1%  | 26.0% |
|           | B     | 0.0%  | 0.0%  | 0.0%  | 0.0%  | 0.0%  |
|           | AB    | 13.5% | 35.4% | 16.7% | 7.3%  | 72.9% |
|           | no    | 0.0%  | 0.0%  | 0.0%  | 1.0%  | 1.0%  |
|           | total | 17.7% | 46.9% | 25.0% | 10.4% |       |

|           |       | XIST  |       |      |       | total |
|-----------|-------|-------|-------|------|-------|-------|
|           |       | A     | B     | AB   | no    |       |
| SUVAR39H1 | A     | 1.0%  | 1.0%  | 0.0% | 7.3%  | 9.4%  |
|           | B     | 15.6% | 9.4%  | 0.0% | 35.4% | 60.4% |
|           | AB    | 5.2%  | 1.0%  | 0.0% | 6.3%  | 12.5% |
|           | no    | 2.1%  | 3.1%  | 0.0% | 12.5% | 17.7% |
|           | total | 24.0% | 14.6% | 0.0% | 61.5% |       |

|           |       | XIST  |       |       |       | total |
|-----------|-------|-------|-------|-------|-------|-------|
|           |       | A     | B     | AB    | no    |       |
| SUVAR39H1 | A     | 5.7%  | 5.7%  | 5.7%  | 9.1%  | 26.1% |
|           | B     | 0.0%  | 0.0%  | 0.0%  | 0.0%  | 0.0%  |
|           | AB    | 19.3% | 11.4% | 15.9% | 12.5% | 59.1% |
|           | no    | 5.7%  | 2.3%  | 3.4%  | 3.4%  | 14.8% |
|           | total | 30.7% | 19.3% | 25.0% | 25.0% |       |

|           |       | XIST  |       |       |       | total |
|-----------|-------|-------|-------|-------|-------|-------|
|           |       | A     | B     | AB    | no    |       |
| SUVAR39H1 | A     | 7.3%  | 2.1%  | 4.2%  | 5.2%  | 18.8% |
|           | B     | 19.8% | 5.2%  | 3.1%  | 6.3%  | 34.4% |
|           | AB    | 13.5% | 2.1%  | 3.1%  | 3.1%  | 21.9% |
|           | no    | 12.5% | 5.2%  | 2.1%  | 5.2%  | 25.0% |
|           | total | 53.1% | 14.6% | 12.5% | 19.8% |       |

|           |       | XIST  |       |       |      | total |
|-----------|-------|-------|-------|-------|------|-------|
|           |       | A     | B     | AB    | no   |       |
| SUVAR39H1 | A     | 9.1%  | 2.3%  | 3.4%  | 1.1% | 15.9% |
|           | B     | 0.0%  | 0.0%  | 0.0%  | 0.0% | 0.0%  |
|           | AB    | 40.9% | 12.5% | 23.9% | 6.8% | 84.1% |
|           | no    | 0.0%  | 0.0%  | 0.0%  | 0.0% | 0.0%  |
|           | total | 50.0% | 14.8% | 27.3% | 8.0% |       |

### Supplemental Figure S3: Single cell allele specific expression analysis of XIST and SUVAR39H1

Quantification of the allele specific expression analysis of *SSEA1+ / TRA1-81+* sorted cells from hiPSC lines at different time points (passages) after reprogramming. Allele specific expression of *XIST* and *SUVAR39H1* was assessed by digestion with MfeI and MspI distinguishing between both parental alleles as shown in **Figure 4D** (A= expression from allele A only, B=expression from allele B only, AB=bi-allelic expression and no=no expression detected) . Each part of the table shows the percentage of cells (total N=96) with specific expression characteristics.

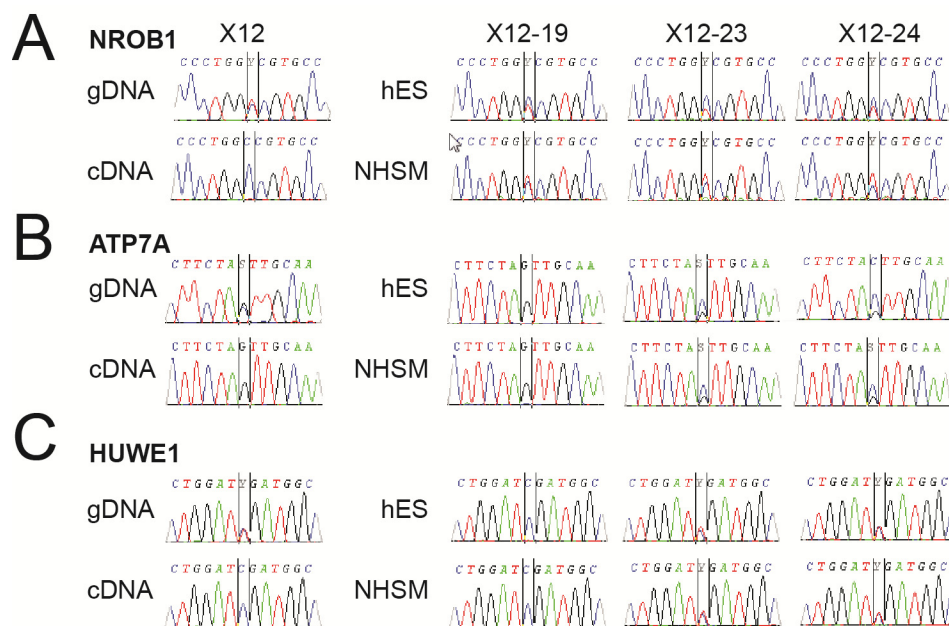

**D**

|             | HUWE1 | ATP7A | NROB1 |
|-------------|-------|-------|-------|
| gDNA X12    | T/C   | G/C   | C/T   |
| cDNA X12    | C/C   | G/G   | C/C   |
| X12-19 hES  | C/C   | G/G   | C/T   |
| X12-19 NHSM | C/C   | G/G   | C/T   |
| X12-23 hES  | T/C   | G/C   | C/T   |
| X12-23 NHSM | T/C   | G/C   | C/T   |
| X12-24 hES  | T/C   | G/C   | C/T   |
| X12-24 NHSM | T/C   | G/C   | C/T   |

**Supplemental Figure S4: Allele specific expression analysis of X-linked genes in X12 hiPSC clones.**

**A,B,C)** Sanger sequencing results of three X-linked genes (**(A)** *NROB1*, **(B)** *ATP7A* **(C)** *HUWE1*), on genomic DNA (gDNA), RNA isolated from X12 fibroblasts (cDNA), and RNA isolated from three different iPSC clones (X12-19, X12-23 and X12-24) grown in human ES (hES) and NHSM medium. **D)** Overview of the results obtained in **(A-C)**.

| nr | code    | source     | karyotype                        | deleted        | cell type      | MLPA/array/ FISH |        |      |   |
|----|---------|------------|----------------------------------|----------------|----------------|------------------|--------|------|---|
|    |         |            |                                  |                |                | array            | HUMARA | FISH |   |
| 9  | GM10254 | Corriel    | 46,X,del(X)(q21.1q21.3)          | 77.5-91.0 Mb   | lymphoblastoid |                  | +      | 76%  | - |
| 10 | GM09332 | Corriel    | 46,X,del(X)(q22q26)              | 102.8-140.6 Mb | lymphoblastoid |                  | +      | 50%  | - |
| 11 | GM13277 | Corriel    | 46,X,del(X)(q13)                 | 75.0-156.0 Mb  | lymphoblastoid |                  | +      | -    | + |
| 12 | GM07148 | Corriel    | 46,X,del(X)(q22.3)               | 108.9-156.0 Mb | fibroblast     |                  | +      | 100% | + |
| 13 | GM06563 | Corriel    | 45,X[36]/46,X,r(X)(p22.3q24)[14] | #              | fibroblast     |                  | -      | 96%  | - |
| 14 | GM03923 | Corriel    | 46,X,del(X)(q21.1q22)            | 78.7-103.7 Mb  | fibroblast     |                  | +      | 98%  | + |
| 15 | GM03827 | Corriel    | 46X,del(X)(q21)                  | 80.5-156.0 Mb  | fibroblast     |                  | +      | 100% | + |
| 16 | 86E1373 | Erasmus MC | 46,XX control                    |                | fibroblast     |                  | -      | 60%  | - |
| 17 | EA1512  | Erasmus MC | 47,XXX                           |                | fibroblast     |                  | +      | -    | - |

**Supplemental Table S1: Overview of collected cell lines harboring X chromosomal deletions**

This table provides an overview of the collected cell lines that were analyzed in this study. Shown is the source and code, the cell type and the outcome of the MLPA and HUMARA studies on the primary cells. Cells that were subjected to a SNP array analysis are also indicated (# mosaic, <30% detectable in MLPA and array).



|                             |                                       |
|-----------------------------|---------------------------------------|
| hu_KDR-FIk-1-F              | CTGGCATGGTCTTCTGTGAAGCA               |
| hu_KDR-FIk-1-R              | AATACCAGTGGATGTGATGGCGG               |
| hu_PAX6-F                   | TTTGCCCGAGAAAGACTAGC                  |
| hu_PAX6-R                   | CATTTGGCCCTTCGATTAGA                  |
| hu_GATA2-F                  | TGACTTCTCCTGCATGCACT                  |
| hu_GATA2-R                  | AGCCGGCACCTGTTGTGCAA                  |
| hu_AFP- F                   | GAAACCCACTGGAGATGAACA                 |
| hu_AFP- R                   | CTGCAGCAGTCTGAATGTCC                  |
| hu_Alb1-F                   | GCTACGGCACAGTGCTTG                    |
| hu_Alb1-R                   | CAGGATTGCAGACAGATAGTC                 |
| hOCT3/4-S1165               | GAC AGG GGG AGG GGA GGA GCT AGG       |
| hOCT3/4-AS1283              | CTT CCC TCC AAC CAG TTG CCC CAA AC    |
| hSOX2-S1430                 | GGG AAA TGG GAG GGG TGC AAA AGA GG    |
| hSOX2-AS1555                | TTG CGT GAG TGT GGA TGG GAT TGG TG    |
| h NANOG-S                   | CAG CCC CGA TTC TTC CAC CAG TCC C     |
| h NANOG-AS                  | CGG AAG ATT CCC AGT CGG GTT CAC C     |
| hGDF3-S243                  | CTT ATG CTA CGT AAA GGA GCT GGG       |
| hGDF3-AS850                 | GTG CCA ACC CAG GTC CCG GAA GTT       |
| hREX1-RT-S                  | CAG ATC CTA AAC AGC TCG CAG AAT       |
| hREX1-RT-AS                 | GCG TAC GCA AAT TAA AGT CCA GA        |
| hFGF4-RT-S                  | CTA CAA CGC CTA CGA GTC CTA CA        |
| hFGF4-RT-AS                 | GTT GCA CCA GAA AAG TCA GAG TTG       |
| h ESG1-S40                  | ATA TCC CGC CGT GGG TGA AAG TTC       |
| h ESG1-AS259                | ACT CAG CCA TGG ACT GGA GCA TCC       |
| hTERT-S3234                 | CCT GCT CAA GCT GAC TCG ACA CCG TG    |
| hTERT-AS3713                | GGA AAA GCT GGC CCT GGG GTG GAG C     |
| hKLF4-F                     | TGA TTG TAG TGC TTT CTG GCT GGG CTC C |
| hKLF4-R                     | ACG ATC GTG GCC CCG GAA AAG GAC C     |
| human c-MYC-F               | GCG TCC TGG GAA GGG AGT TCC GGA GC    |
| human c-MYC-R               | TTG AGG GGC ATC GTC GCG GGA GGC TG    |
| SUVAR39 2192 nest for       | AGGCACTGGGTAGAGCACCT                  |
| SUVAR39 2710 nest rev       | TTTTATTGATGCCCACTCCA                  |
| hXIST SNP1 nest for         | AATGGGCAAAGTGGTTATGC                  |
| hXIST SNP1 nest rev         | AGGCCCTTTCTCAAAGTGT                   |
| SUVAR39-F                   | GCATAGGGTTGAGGGGTGTA                  |
| SUVAR39-R                   | TTTGTGCTCACCTGGTTC                    |
| XIST SNP1 nested int F 6033 | TTTCTTGGCCTCCCAATATG                  |
| XIST SNP1 nested int R 6610 | CAGGAACCGGGACAAACA                    |

|                      |                             |
|----------------------|-----------------------------|
| ATP7A (gDNA)         | AACACGATTGTTTTGGCTTAATCTCC  |
| ATP7A (gDNA)         | AGTGCAATAAACACAAACAGCATAGGG |
| ATP7A (cDNA)         | TGGTTATGGACCACCACTTTGC      |
| ATP7A (cDNA)         | TTTTGCCCTTTGCTATATGTTCCAG   |
| HUWE1 (gDNA)         | TTTGCTGGGTAGAATTAAGCTCTGC   |
| HUWE1 (gDNA)         | GGGCAAATACACAACACATAGAAAACG |
| HUWE1 (cDNA)         | TGCTACCCGTGAAGTCCTTGG       |
| HUWE1 (cDNA)         | GCTCTGCATGGCCTGTACTIONTCC   |
| NORB1 (gDNA)         | TTTACCCCTGGCCTCTGC          |
| NORB1 (gDNA)         | AGAGACGCGGCTGGTGGAT         |
| NORB1 (cDNA)         | ATGCTGACGAGCGCAAAGC         |
| NORB1 (cDNA)         | CTTGGTGCATCCTGGTG           |
| NORB1 (cDNA)         | ATGCTGACGAGCGCAAAGC         |
| NORB1 (cDNA)         | CGGCACGTCCGGGTTAAAG         |
| FAM-labelled primer1 | GCTGTGAAGGTTGCTGTTCCCTCAT   |
| FAM-labelled primer2 | TCCAGAATCTGTTCCAGAGCGTGC    |

**Supplemental Table S2: Primers used in this study**

A description of the primers that were used in the experiments described in this manuscript.
